# Supplementary material for: A pyrolyzed polyacrylonitrile/selenium disulfide composite cathode with remarkable lithium and sodium storage performances
Source: PubMed Central journal article supplement — Sci Adv. 2018 Jun 8;4(6):eaat1687. doi: 10.1126/sciadv.aat1687 (PMC5993473; doi:10.1126/sciadv.aat1687), 2018-06-08
Supplement: aat1687_SM.pdf [file aat1687_SM.pdf]

## Supplementary Materials for

### **A pyrolyzed polyacrylonitrile/selenium disulfide composite cathode with remarkable lithium and sodium storage performances**

Zhen Li, Jintao Zhang, Yan Lu, Xiong Wen (David) Lou

Published 8 June 2018, *Sci. Adv.* **4**, eaat1687 (2018)

DOI: 10.1126/sciadv.aat1687

#### **This PDF file includes:**

- fig. S1. Schematic illustrations of the chemical structure and synthesis method.
- fig. S2. EDX mappings of pPAN/SeS<sub>2</sub>.
- fig. S3. N<sub>2</sub> sorption isotherms of multichannel pPAN/SeS<sub>2</sub> fibers and pPAN/SeS<sub>2</sub> powder.
- fig. S4. Morphology characterizations.
- fig. S5. TGA curves of pPAN/S and pPAN/Se.
- fig. S6. The active material contents of various PAN-supported or microporous carbon-supported composites for Li-S or Li-Se/S batteries.
- fig. S7. EIS of pPAN/S, pPAN/SeS<sub>2</sub>, and pPAN/Se.
- fig. S8. Comparisons of capacity utilization and energy density for Li storage.
- fig. S9. CV curves from 0.2 to 1.2 mV s<sup>-1</sup>.
- fig. S10. Rate performances.
- fig. S11. Comparison of normalized capacities.
- fig. S12. CV curves and voltage profiles of pPAN/SeS<sub>2</sub> for Na storage.
- fig. S13. Comparisons of RT Na-S and Na-Se/S batteries.
- References (54–63)

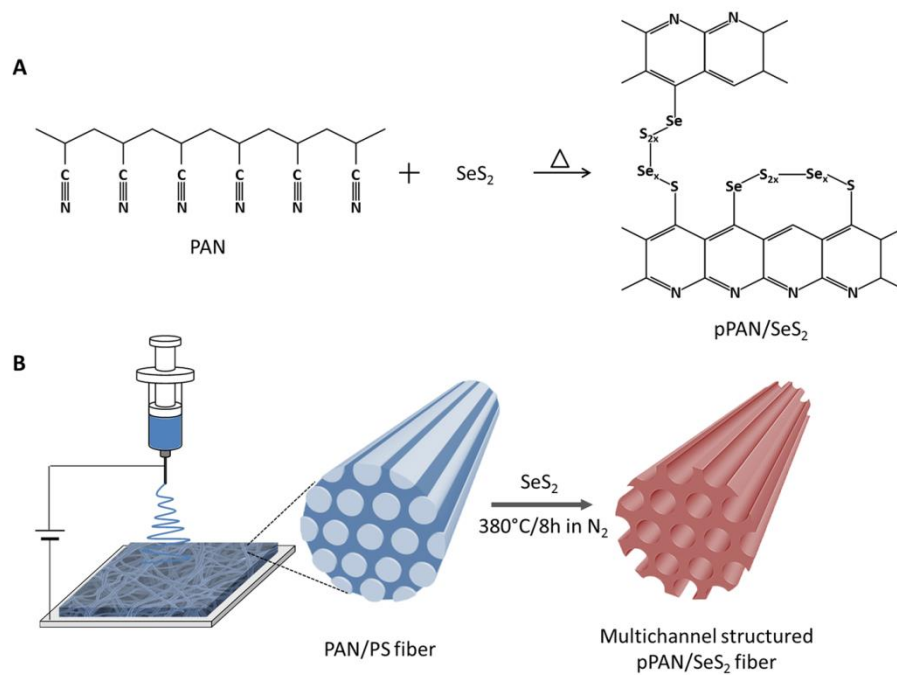

**fig. S1. Schematic illustrations of the chemical structure and synthesis method.** (A) The proposed chemical structure of pPAN/SeS<sub>2</sub>. (B) The synthesis process of pPAN/SeS<sub>2</sub>.

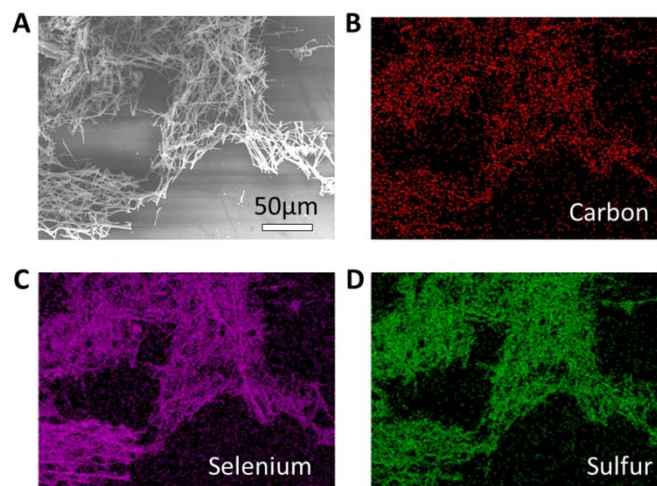

**fig. S2. EDX mappings of pPAN/SeS<sub>2</sub>.** (A) SEM image of pPAN/SeS<sub>2</sub> and the corresponding elemental distributions of (B) C, (C) Se and (D) S.

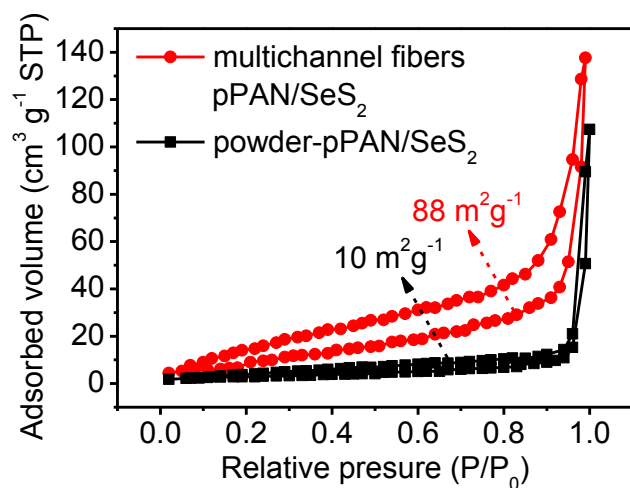

**fig. S3. N<sub>2</sub> sorption isotherms of multichannel pPAN/SeS<sub>2</sub> fibers and pPAN/SeS<sub>2</sub> powder.** Due to the decomposing of PS at elevated temperature, the multichannel pPAN/SeS<sub>2</sub> fibers show a BET specific surface area of 88 m<sup>2</sup> g<sup>-1</sup> which is nearly 8 times higher than that of the pPAN/SeS<sub>2</sub> powder (10 m<sup>2</sup> g<sup>-1</sup>).

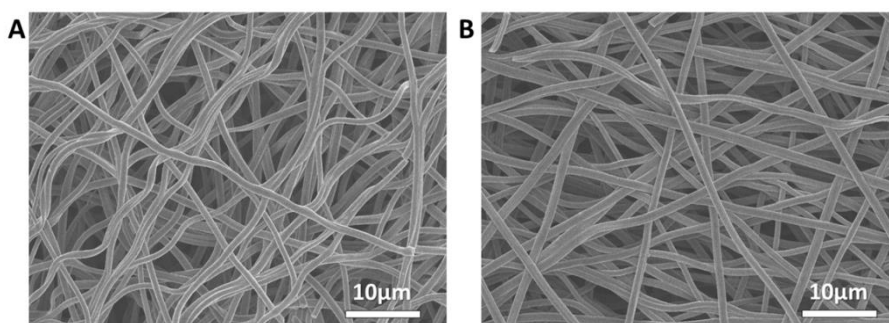

**fig. S4. Morphology characterizations.** SEM images of (A) pPAN/S and (B) pPAN/Se.

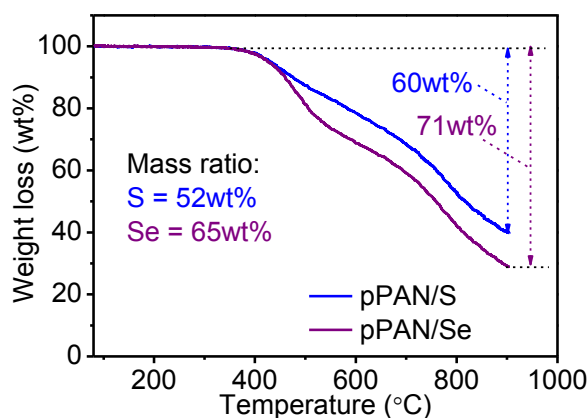

**fig. S5. TGA curves of pPAN/S and pPAN/Se.** Based on that pure pPAN losses 17 wt% of weight when heated to 900 °C in N<sub>2</sub> atmosphere, the mass ratios of S and Se in pPAN/S and pPAN/Se are calculated to be 52 wt% and 65 wt%, respectively.

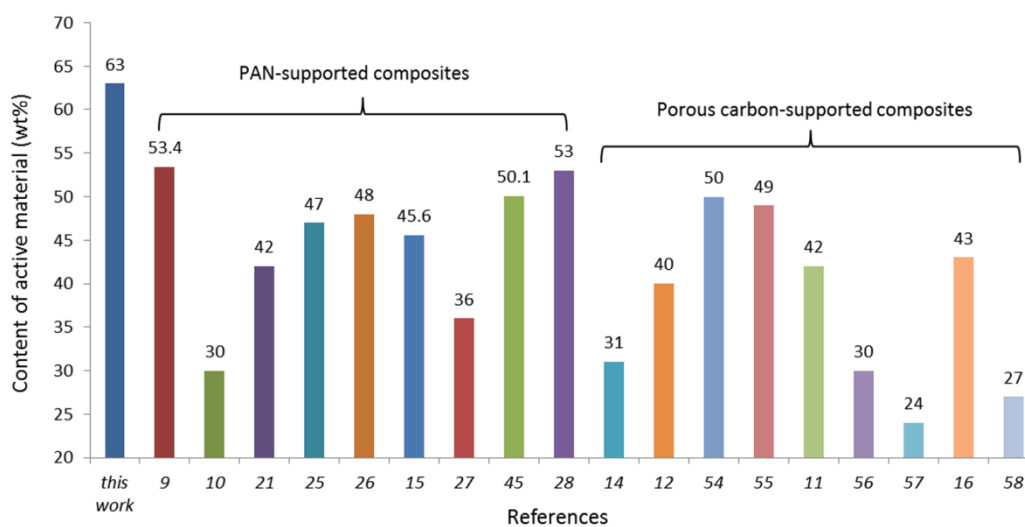

**fig. S6. The active material contents of various PAN-supported or microporous carbon-supported composites for Li-S or Li-Se/S batteries.** The composite cathodes for comparison are selected from recent studies, in which the cathodes are well matched with LiPF<sub>6</sub>-carbonate-based electrolytes: pPAN/S(9), pPAN/S(10), SPAN(21), pPAN-S/GNS(25), pPAN-S/MWCNT(26), SPAN4(15), PAN-S-VA(27), Se/PAN(45), C/S/PAN(28), C/S(14), S/(CNT@MPC)(12), S<sub>0.94</sub>Se<sub>0.06</sub>/C(54), S<sub>0.94</sub>Se<sub>0.06</sub>@PCNFs(55), C/S(11), C/S(56), NC/S(57), MCP/S(16), and S/CA(58).

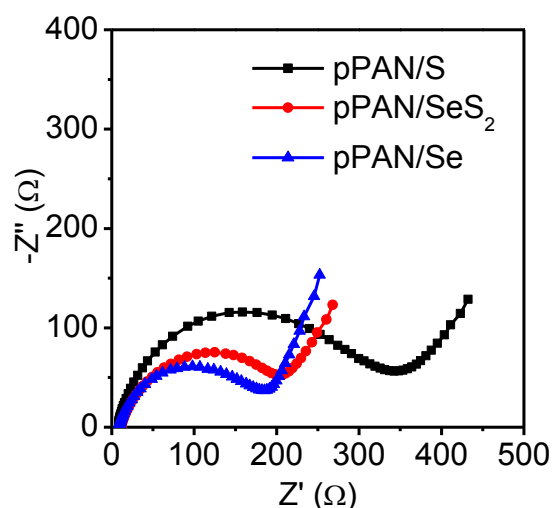

**fig. S7.** EIS of pPAN/S, pPAN/SeS<sub>2</sub>, and pPAN/Se. The Nyquist plots of different groups were collected from 100 kHz to 1Hz before cycling tests.

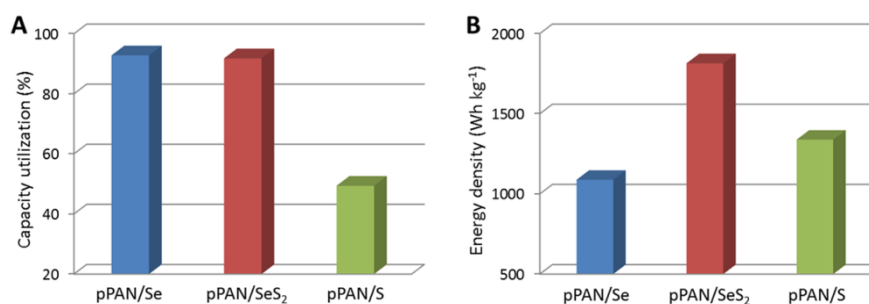

**fig. S8. Comparisons of capacity utilization and energy density for Li storage.** Comparisons on (A) capacity utilization and (B) energy density of pPAN/S, pPAN/SeS<sub>2</sub>, and pPAN/Se for Li-storage at 0.5 A g<sup>-1</sup>. The capacity utilizations are calculated based on the specific capacities and theoretical capacities of S, SeS<sub>2</sub> and Se, respectively. The voltage values used for calculating energy densities are selected at 50 % depth of discharge (DOD).

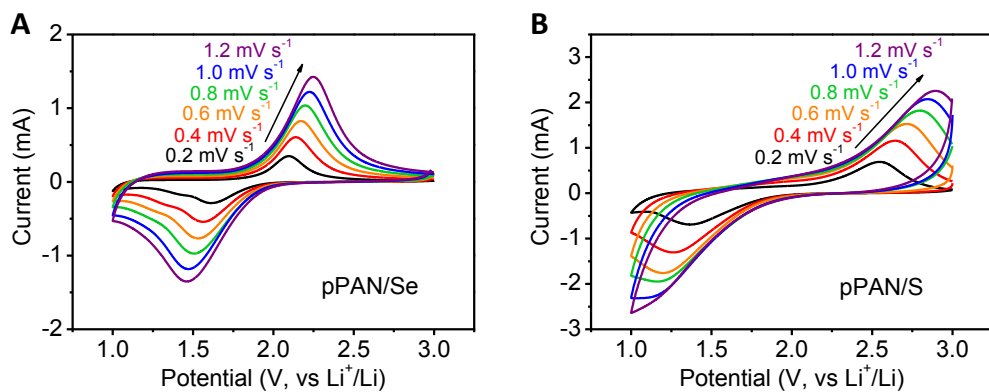

**fig. S9. CV curves from 0.2 to 1.2 mV s<sup>-1</sup>.** CV curves of (A) pPAN/Se and (B) pPAN/S in voltage range of 1.0 – 3.0 V with Li metal as anode.

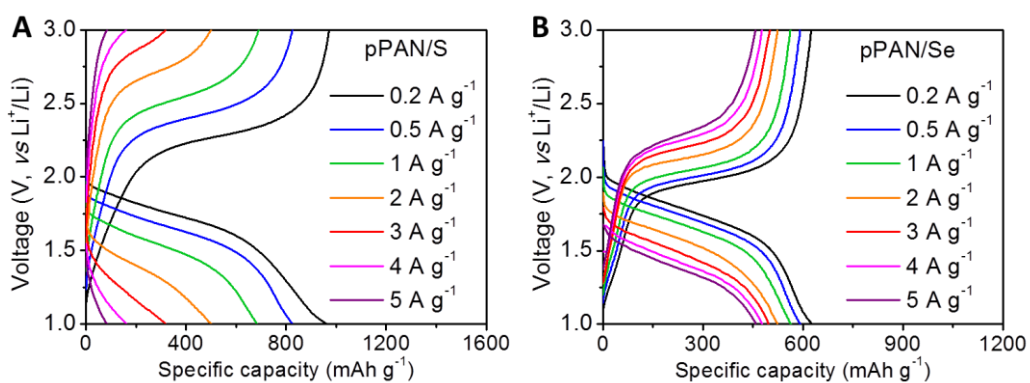

**fig. S10. Rate performances.** Voltage profiles of (A) pPAN/S and (B) pPAN/Se at various current densities from 0.2 to 5 A g<sup>-1</sup> for Li storage.

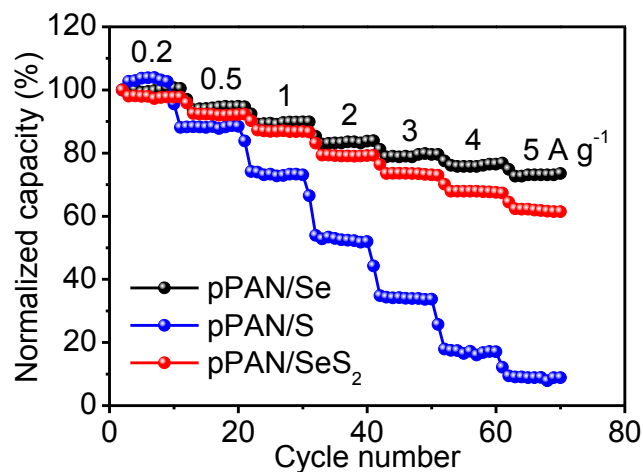

**fig. S11. Comparison of normalized capacities.** Normalized capacities at various current densities from 0.2 to 5 A g<sup>-1</sup> of pPAN/S, pPAN/SeS<sub>2</sub>, and pPAN/Se for Li-storage. The normalized capacity is based on the 2<sup>nd</sup> discharging capacities of each group.

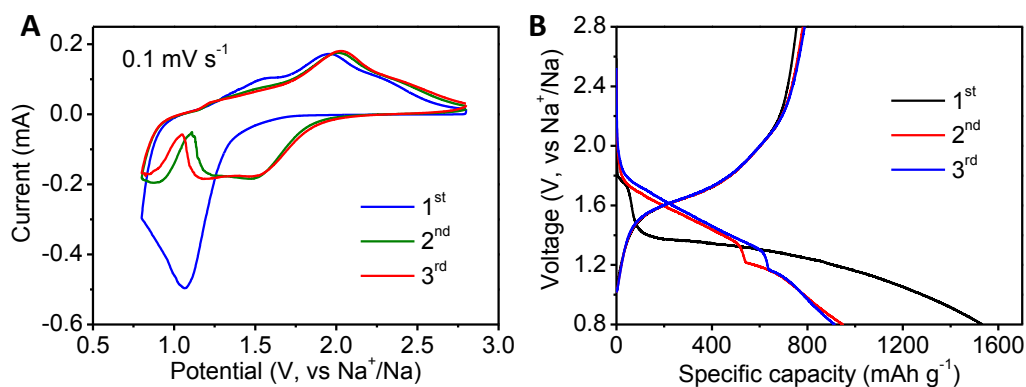

**fig. S12. CV curves and voltage profiles of pPAN/SeS<sub>2</sub> for Na storage.** (A) CV curves at 0.1 mV s<sup>-1</sup> and (B) voltage profiles at 0.1 A g<sup>-1</sup> of the RT Na-SeS<sub>2</sub> battery in the voltage range of 0.8 – 2.8 V vs Na<sup>+</sup>/Na.

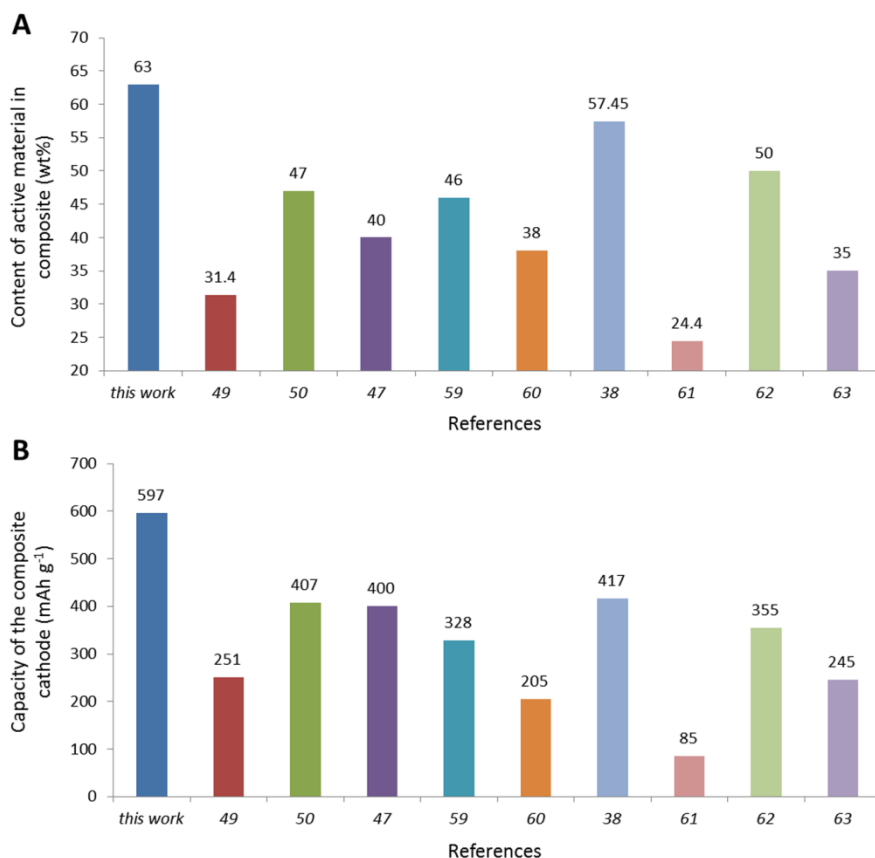

**fig. S13. Comparisons of RT Na-S and Na-Se/S batteries.** Comparisons of (A) active material contents in the composites and (B) overall capacities of the composites. Since the 1<sup>st</sup> discharge capacities are usually accompanied with side reactions, the capacity values are based on the 2<sup>nd</sup> discharge capacities of the composites. The composite cathodes for comparison are selected from recent studies of RT Na-S batteries: c-PANS(49), MCPS1(50), S/(CNT@MPC)(47), S@iMCHS(59), C/S(60), S<sub>0.6</sub>Se<sub>0.4</sub>@CNFs(38), CFC/S(61), HSMC-Gu-S(62), and C/S(63).
